# Supplementary material
Source: PubMed Central journal article supplement (PMC4042771)
Supplement: JCM.00570-14_zjm999093460so1.pdf [file JCM.00570-14_zjm999093460so1.pdf]

**SUPPLEMENTAL TABLE 1: Synovial Fluid Culture/PCR-ESI/MS Discordance**

| Case number | Diagnosis | Year | Time to surgery | Antibiotic use | SF cell count/ $\mu$ l | Neutrophil % | ESR mm/hr | CRP mg/dl | Purulence | Pathology | Synovial fluid culture | Tissue culture                                     | PCR-ESI/MS                                         |         |       |
|-------------|-----------|------|-----------------|----------------|------------------------|--------------|-----------|-----------|-----------|-----------|------------------------|----------------------------------------------------|----------------------------------------------------|---------|-------|
|             |           |      |                 |                |                        |              |           |           |           |           |                        |                                                    | Organism                                           | Q score | Level |
| 180         | PJI       | 2001 | 45 days         | No             | 57304                  | 90           | 84        | 16.4      | No        | AE        | CoNS                   | CoNS (3/3 samples)                                 | Negative                                           |         |       |
| 181         | PJI       | 2001 | No surgery      | Doxycycline    | 38948                  | 80           | 75        | 3.7       | N/A       | N/A       | CoNS, broth only       | N/A                                                | Negative                                           |         |       |
| 204         | AF        | 2002 | 1 day           | No             | 780                    | 8            | 10        | 2.72      | No        | AE, NAI   | Negative               | Negative (2 samples)                               | <i>Propionibacterium acnes</i>                     | 0.98    | 24    |
|             |           |      |                 |                |                        |              |           |           |           |           |                        |                                                    | Viridans/salivarius group <i>Streptococcus</i> sp. | 0.96    | 3     |
|             |           |      |                 |                |                        |              |           |           |           |           |                        |                                                    | Viridans/mitis group <i>Streptococcus</i> sp.      | 0.95    | 4     |
| 214         | AF        | 2002 | 7 days          | No             | N/A                    | N/A          | N/A       | N/A       | No        | AE, NAI   | Negative               | Negative (3 samples)                               | <i>Staphylococcus epidermidis</i>                  | 0.99    | 160   |
|             |           |      |                 |                |                        |              |           |           |           |           |                        |                                                    | <i>mecA</i>                                        | 0.97    | 186   |
| 215         | PJI       | 2002 | 13 days         | No             | 34661                  | 99           | 74        | 15.4      | Yes       | AI        | CoNS                   | CoNS (3/3 samples)                                 | <i>Propionibacterium acnes</i>                     | 0.98    | 62    |
|             |           |      |                 |                |                        |              |           |           |           |           |                        |                                                    | <i>Candida tropicalis</i>                          | 0.96    | 32    |
| 221         | AF        | 2002 | No surgery      | No             | 10008                  | 68           | N/A       | N/A       | N/A       | N/A       | Negative               | N/A                                                | <i>Staphylococcus haemolyticus</i>                 | 0.94    | 10    |
| 234         | PJI       | 2003 | 1 day           | No             | 2465                   | 91           | 83        | 18.7      | Yes       | AI        | Negative               | CoNS, broth only (1/3 samples)                     | <i>Staphylococcus epidermidis</i>                  | 0.97    | 24    |
|             |           |      |                 |                |                        |              |           |           |           |           |                        | <i>Lactobacillus</i> sp., broth only (1/3 samples) | <i>mecA</i>                                        | 0.97    | 10    |

|                  |                 |      |           |              |      |    |     |      |    |         |          |                                                    |                                                              |                                     |      |   |
|------------------|-----------------|------|-----------|--------------|------|----|-----|------|----|---------|----------|----------------------------------------------------|--------------------------------------------------------------|-------------------------------------|------|---|
| 277              | AF <sup>a</sup> | 2004 | 45 days   | No           | 104  | 31 | 2   | 0.02 | No | NAI     | Negative | <i>Klebsiella</i> sp., broth only<br>(1/3 samples) | <i>Propionibacterium acnes</i> , broth only<br>(1/3 samples) | <i>Enterobacter cloacae</i> complex | 0.96 | 3 |
|                  |                 |      |           |              |      |    |     |      |    |         |          |                                                    |                                                              | <i>Acinetobacter baumannii</i>      | 0.94 | 4 |
| 285              | AF <sup>a</sup> | 2004 | 2 months  | No           | 52   | 26 | 40  | 1.33 | No | AE, NAI | Negative | Negative<br>(3 samples)                            | <i>Staphylococcus aureus</i>                                 | 0.9                                 | 3    |   |
|                  |                 |      |           |              |      |    |     |      |    |         |          |                                                    | <i>mecA</i>                                                  | 0.98                                | 1    |   |
| 287              | AF <sup>a</sup> | 2004 | 20 days   | no           | 1924 | 16 | 10  | 0.41 | No | AE, NAI | Negative | Negative<br>(3 samples)                            | <i>Propionibacterium acnes</i>                               | 0.98                                | 149  |   |
| 297              | AF <sup>a</sup> | 2004 | 1 day     | No           | 572  | 0  | N/A | N/A  | No | AE, NAI | Negative | Negative<br>(3 samples)                            | <i>Staphylococcus warneri</i>                                | 0.98                                | 24   |   |
| 331              | AF <sup>a</sup> | 2005 | 2 months  | No           | 364  | 14 | 3   | 0.3  | No | AE, NAI | Negative | Negative<br>(2 samples)                            | <i>Methylobacterium mesophilium</i>                          | 0.94                                | 4    |   |
| 332 <sup>a</sup> | AF <sup>b</sup> | 2005 | 16 months | No           | 988  | 14 | 5   | 0.30 | No | AE, NAI | Negative | Negative<br>(3 samples)                            | <i>Micrococcus lylae/luteus</i>                              | 0.9                                 | 15   |   |
| 350              | AF <sup>c</sup> | 2005 | 3 days    | Tetracycline | 2236 | 14 | 14  | 0.8  | No | NAI     | Negative | Negative<br>(3 samples)                            | <i>Micrococcus lylae</i>                                     | 0.99                                | 14   |   |

SF, Synovial fluid; ESR, Erythrocyte sedimentation rate; CRP, C-reactive protein; N/A, not applicable; AE, Arthroplasty effect; NAI, No acute inflammation; AI, Acute inflammation; CoNS, Coagulase-negative *Staphylococcus* species; AF, Aseptic failure; PJI, Prosthetic joint infection.

<sup>a</sup>Cases in which sonicate fluid culture was available and negative

<sup>b</sup>Case 332 had negative sonicate fluid culture and PCR-ESI/MS

<sup>c</sup>Case 350 had sonicate fluid culture with <5 cfu/10 ml *Corynebacterium* sp. (considered negative)

**SUPPLEMENTAL TABLE 2: Follow-up of Aseptic Failure Cases with Positive PCR-ESI/MS Results**

| Case Number | PCR-ESI/MS Result                                                                                                                                              | Year of Specimen Collection | History of Prior PJI                                       | Use of Antibiotic-Coated Cement on Revision Surgery | Follow up Events                                                                                                                                                                                                                                                                                                                                                                                                                                                                  |
|-------------|----------------------------------------------------------------------------------------------------------------------------------------------------------------|-----------------------------|------------------------------------------------------------|-----------------------------------------------------|-----------------------------------------------------------------------------------------------------------------------------------------------------------------------------------------------------------------------------------------------------------------------------------------------------------------------------------------------------------------------------------------------------------------------------------------------------------------------------------|
| 204         | <i>Propionibacterium acnes</i> ,<br>Viridans/ <i>salivarius</i> group<br><i>Streptococcus</i> sp.,<br>Viridans/ <i>mitis</i> group<br><i>Streptococcus</i> sp. | 2002                        | No                                                         | Vancomycin-gentamicin                               | 2007: Asymptomatic                                                                                                                                                                                                                                                                                                                                                                                                                                                                |
| 214         | <i>S. epidermidis</i>                                                                                                                                          | 2002                        | 2001: <i>Streptococcus agalactiae</i> infection same joint | N/A (polyethylene liner replacement only)           | 2004: Patient fell and developed knee pain; aspiration and inflammatory markers not suggestive of infection; radiologic lucency present<br>2005: Revision surgery: cultures negative, no intraarticular purulence, pathology negative for acute inflammation<br>2006: Cellulitis around knee and <i>Streptococcus agalactiae</i> bacteremia; infection suspected, but not proven (aspiration not attempted; chronic antimicrobial suppression administered)<br>2009: Asymptomatic |
| 221         | <i>S. haemolyticus</i>                                                                                                                                         | 2002                        | No                                                         | No surgery performed                                | No data                                                                                                                                                                                                                                                                                                                                                                                                                                                                           |
| 277         | <i>Enterobacter cloacae</i> complex,<br><i>Acinetobacter baumannii</i>                                                                                         | 2004                        | No                                                         | Vancomycin-gentamicin                               | 2006: Developed chronic pain postoperatively, with no radiologic evidence of infection (plain radiographs)<br>2009: Improved pain; small area radiologic lucency                                                                                                                                                                                                                                                                                                                  |

|     |                                     |      |                                                               |                       |                                                                                                                                                                                                                                                                          |
|-----|-------------------------------------|------|---------------------------------------------------------------|-----------------------|--------------------------------------------------------------------------------------------------------------------------------------------------------------------------------------------------------------------------------------------------------------------------|
|     |                                     |      |                                                               |                       | Postoperative chronic joint pain, inflammation and waxing/waning erythema with increased ESR and CRP                                                                                                                                                                     |
| 285 | <i>S. aureus</i>                    | 2004 | 2001: <i>S. aureus</i> infection in the same joint prosthesis | Vancomycin-gentamicin | 2007: Minocycline administered empirically (undetermined duration)<br><br>2010: Knee aspiration negative. ESR and CRP elevated<br><br>2012: Abnormal triple phase bone scan. No joint symptoms                                                                           |
| 287 | <i>P. acnes</i>                     | 2004 | No                                                            | Gentamicin            | Postoperative chronic joint pain<br><br>2012: Radiographic lucency<br><br>2013: Revision surgery scheduled (pending)                                                                                                                                                     |
| 297 | <i>S. warneri</i>                   | 2004 | No                                                            | Gentamicin            | 2006: Minor knee discomfort, no X-ray findings of infection                                                                                                                                                                                                              |
| 331 | <i>Methylobacterium mesophilium</i> | 2005 | No                                                            | Gentamicin            | 2010: Asymptomatic                                                                                                                                                                                                                                                       |
| 332 | <i>Micrococcus lylae/luteus</i>     | 2005 | No                                                            | Vancomycin-gentamicin | 2011: Asymptomatic                                                                                                                                                                                                                                                       |
| 350 | <i>Micrococcus lylae</i>            | 2005 | No                                                            | Vancomycin-gentamicin | 2012: New onset knee pain<br><br>2013: Revision surgery. Synovial fluid leukocyte 2170 cells/ $\mu$ l (8% neutrophils); ESR, 15 mm/hr; CRP 0.7 mg/dl. Cultures (synovial fluid, tissue and sonicate fluid) negative. No intraarticular purulence, no acute inflammation. |

N/A: Non-applicable; ESR, Erythrocyte sedimentation rate; CRP, C-Reactive protein
